# Supplementary material
Source: PubMed Central journal article supplement (PMC470719)
Supplement: pnas_101_26_9590__1.pdf [file pnas_101_26_9590__1.pdf]

**Table 1. Description of inserts used in monocistronic constructs**

| Insert                                                                                        | Description                                                                                                                                                                                                                                                                                                                                                                                                                                                                                                                                                                                                                                                                                                                                                                                                                                                                                  |
|-----------------------------------------------------------------------------------------------|----------------------------------------------------------------------------------------------------------------------------------------------------------------------------------------------------------------------------------------------------------------------------------------------------------------------------------------------------------------------------------------------------------------------------------------------------------------------------------------------------------------------------------------------------------------------------------------------------------------------------------------------------------------------------------------------------------------------------------------------------------------------------------------------------------------------------------------------------------------------------------------------|
| <p>DNA oligonucleotides for the generation of a multiple cloning site in the pGL3c vector</p> | <p>Oligonucleotide linkers used to generate a multiple cloning site in the pGL3-control vector. Annealed oligonucleotides generate a cassette with overhanging <i>HindIII</i>/<i>NcoI</i> sites which are then ligated into the pGL3-control vector restricted with the same endonucleases. The cassette introduces <i>SpeI</i> and <i>EcoRI</i> restriction so that the inserts described below can be inserted into the 5' UTR of monocistronic FF luciferase.</p> <p style="text-align: center;"><i>HindIII</i>      <i>SpeI</i>                  <i>EcoRI</i>                  <i>NcoI</i></p> <p style="text-align: center;"><u>AGCTT</u> AAA <u>ACTAGT</u> AAA <u>GAATTC</u> AAA <u>C</u></p> <p style="text-align: center;">A TTT TGATCA TTT CTTAAG TTT GGTAC</p> <p><i>Forward</i> - AGCTT AAA ACTAGT AAA GAATTC AAA C</p> <p><i>Reverse</i> - CATGG TTT GAATTC TTT ACTAGT TTT A</p> |
| <p>(Gtx 9-nt)<sub>5</sub>(SI)<sub>5</sub>β</p>                                                | <p>Five repeats of the Gtx IRES-module interspersed with 9-nt spacers based on a segment of the β-globin 5' UTR (SI). This sequence is spaced 25 nt upstream of the initiator AUG with the β-globin-5' UTR. The constructs that follow (m1–m15) are based on this format. In constructs in which the complementary match was increased, nucleotides in the 9-nt Gtx element were mutated to A (m1–m8), whereas in constructs in which the complementary match was increased, nucleotides in the flanking sequence were mutated accordingly (m9–m15).</p> <p style="text-align: center;"><u>GAATTC</u> <i>TTCTGACAT CCGGCGGGT TTCTGACAT</i></p> <p style="text-align: center;"><i>CCGGCGGGT TTCTGACAT CCGGCGGGT TTCTGACAT</i></p> <p style="text-align: center;"><i>CCGGCGGGT TTCTGACAT CCGGCGGGT</i></p> <p style="text-align: center;"><i>GACTCACAACCCAGAAACAGACAT</i> <u>CCATGG</u></p>    |

| Insert | Description                                                                                                                                                                                                                                                                                                                                                                        |
|--------|------------------------------------------------------------------------------------------------------------------------------------------------------------------------------------------------------------------------------------------------------------------------------------------------------------------------------------------------------------------------------------|
| m1     | <p>Decrease the length of complementarity at the 3' end by 1 nt (<u>U</u> CCGGCGGGU <u>U</u> ⇒ <u>U</u> CCGGCGGGU <u>A</u>)</p> <p><i><u>GAATTC</u> TTCTGACAU CCGGCGGGT ATCTGACAU<br/> CCGGCGGGT ATCTGACAU CCGGCGGGT ATCTGACAU<br/> CCGGCGGGT ATCTGACAU CCGGCGGGT<br/> AACTCACAACCCAGAAACAGACAT <u>CCATGG</u></i></p>                                                              |
| m2     | <p>Decrease the length of complementarity in the Gtx IRES-module at the 3' end by 1 nt (CCGGCGGGU ⇒ CCGGCGGGA)</p> <p><i><u>GAATTC</u> TTCTGACAT CCGGCGGGA TTCTGACAT<br/> CCGGCGGGA TTCTGACAT CCGGCGGGA TTCTGACAT<br/> CCGGCGGGA TTCTGACAT CCGGCGGGA<br/> GACTCACAACCCAGAAACAGACAT <u>CCATGG</u></i></p>                                                                           |
| m3     | <p>Decreases the length of complementarity in the Gtx IRES-module at the 3' end by 2 nt (CCGGCGGGU ⇒ CCGGCGGAA)</p> <p><b><i>SpeI</i></b></p> <p><i><u>ACTAGT</u> CAGCTG <u>GAATTC</u> TTCTGACAT CCGGCGGAA<br/> TTCTGACAT CCGGCGGAA TTCTGACAT CCGGCGGAA<br/> TTCTGACAT CCGGCGGAA TTCTGACAT CCGGCGGAA<br/> GACTCACAACCCAGAAACAGACAT <u>CCATGG</u></i></p> <p><b><i>NcoI</i></b></p> |
| m4     | <p>Decrease the length of complementarity in the Gtx IRES-module at the 3' end by 3 nt (CCGGCGGGU ⇒ CCGGCGAAA)</p> <p><i><u>GAATTC</u> TTCTGACAT CCGGCGAAA TTCTGACAT<br/> CCGGCGAAA TTCTGACAT CCGGCGAAA TTCTGACAT</i></p>                                                                                                                                                          |

| Insert | Description                                                                                                                                                                                                                                                                                                                                                                   |
|--------|-------------------------------------------------------------------------------------------------------------------------------------------------------------------------------------------------------------------------------------------------------------------------------------------------------------------------------------------------------------------------------|
|        | <p><b>CCGGCGAAA TTCTGACAT CCGGCGAAA</b><br/> <b><i>GACTCACAACCCAGAAACAGACAT <u>CCATGG</u></i></b></p>                                                                                                                                                                                                                                                                         |
| m5     | <p>Decrease the length of complementarity in the Gtx IRES-module at the 3' end by 4 nt (<b>CCGGCGGGU ⇒ CCGGCAAAA</b>)</p> <p><b><i><u>GAATTC</u> TTCTGACAT CCGGCAAAA TTCTGACAT</i></b><br/> <b><i>CCGGCAAAA TTCTGACAT CCGGCAAAA TTCTGACAT</i></b><br/> <b><i>CCGGCAAAA TTCTGACAT CCGGCAAAA</i></b><br/> <b><i>GACTCACAACCCAGAAACAGACAT <u>CCATGG</u></i></b></p>              |
| m6     | <p>Decrease the length of complementarity at the 5' end by 1 nt (<b><u>U</u> CCGGCGGGU <u>U</u> ⇒ <u>A</u> CCGGCGGGU <u>U</u>)</b></p> <p><b><i><u>GAATTC</u> TTCTGACAA CCGGCGGGT TTCTGACAA</i></b><br/> <b><i>CCGGCGGGT TTCTGACAA CCGGCGGGT TTCTGACAA</i></b><br/> <b><i>CCGGCGGGT TTCTGACAA CCGGCGGGT</i></b><br/> <b><i>GACTCACAACCCAGAAACAGACAT <u>CCATGG</u></i></b></p> |
| m7     | <p>Decrease the length of complementarity in the Gtx IRES-module at the 5' end by 1 nt (<b>CCGGCGGGU ⇒ ACGGCGGGU</b>)</p> <p><b><i><u>GAATTC</u> TTCTGACAT ACGGCGGGT TTCTGACAT</i></b><br/> <b><i>ACGGCGGGT TTCTGACAT ACGGCGGGT TTCTGACAT</i></b><br/> <b><i>ACGGCGGGT TTCTGACAT ACGGCGGGT</i></b><br/> <b><i>GACTCACAACCCAGAAACAGACAT <u>CCATGG</u></i></b></p>              |
| m8     | <p>Five repeats of the β-globin spacer (I) interspersed with 9-nt poly(A) segments (SIII). Spaced 27 nt upstream of the initiator AUG with β-globin 5' UTR.</p> <p><b><i><u>GAATTC</u> TTCTGACAT AAAAAAAAAA TTCTGACAT</i></b><br/> <b><i>AAAAAAAAAA TTCTGACAT AAAAAAAAAA TTCTGACAT</i></b><br/> <b><i>AAAAAAAAAA TTCTGACAT AAAAAAAAAA</i></b></p>                             |

| Insert | Description                                                                                                                                                                                                                                                                                                                                  |
|--------|----------------------------------------------------------------------------------------------------------------------------------------------------------------------------------------------------------------------------------------------------------------------------------------------------------------------------------------------|
|        | <i>GACTCACAACCCCAGAAACAGACAT <u>CCATGG</u></i>                                                                                                                                                                                                                                                                                               |
| m9     | <p>Increase the length of complementarity in the Gtx IRES-module at the 3' end by 1 nt (<i>GACAU CCGGCGGGU UUCUG</i> ⇒ <i>GACAU CCGGCGGGU CUCUG</i>)</p> <p><i><u>GAATTC</u> TTCTGACAT CCGGCGGGT CTCTGACAT<br/>CCGGCGGGT CTCTGACAT CCGGCGGGT CTCTGACAT<br/>CCGGCGGGT CTCTGACAT CCGGCGGGT<br/>CACTCACAACCCCAGAAACAGACAT <u>CCATGG</u></i></p> |
| m10    | <p>Increase the length of complementarity in the Gtx IRES-module at the 3' end by 2 nt (<i>GACAU CCGGCGGGU UUCUG</i> ⇒ <i>GACAU CCGGCGGGU CACUG</i>)</p> <p><i><u>GAATTC</u> TTCTGACAT CCGGCGGGT CACTGACAT<br/>CCGGCGGGT CACTGACAT CCGGCGGGT CACTGACAT<br/>CCGGCGGGT CACTGACAT CCGGCGGGT<br/>CACTCACAACCCCAGAAACAGACAT <u>CCATGG</u></i></p> |
| m11    | <p>Increase the length of complementarity in the Gtx IRES-module at the 3' end by 3-nt (<i>GACAU CCGGCGGGU UUCUG</i> ⇒ <i>GACAU CCGGCGGGU CAUUG</i>)</p> <p><i><u>GAATTC</u> TTCTGACAT CCGGCGGGT CATTGACAT<br/>CCGGCGGGT CATTGACAT CCGGCGGGT CATTGACAT<br/>CCGGCGGGT CATTGACAT CCGGCGGGT<br/>CATTACAACCCCAGAAACAGACAT <u>CCATGG</u></i></p>  |
| m12    | <p>Increase the length of complementarity in the Gtx IRES-module at the 3' end by 4 nt (<i>GACAU CCGGCGGGU UUCUG</i> ⇒ <i>GACAU CCGGCGGGU CAUGG</i>)</p> <p><i><u>GAATTC</u> TTCTGACAT CCGGCGGGT CATGGACAT</i></p>                                                                                                                           |

| Insert | Description                                                                                                                                                                                                                                                                                                                                                                             |
|--------|-----------------------------------------------------------------------------------------------------------------------------------------------------------------------------------------------------------------------------------------------------------------------------------------------------------------------------------------------------------------------------------------|
|        | <p><b>CCGGCGGGT CATGGACAT CCGGCGGGT CATGGACAT</b><br/> <b>CCGGCGGGT CATGGACAT CCGGCGGGT</b><br/> <b>CATGCACAACCCAGAAACAGACAT <u>CCATGG</u></b></p>                                                                                                                                                                                                                                      |
| m13    | <p>Increase the length of complementarity in the Gtx IRES-module at the 5' end by 1 nt (<i>GACAU CCGGCGGGU UUCUG</i> ⇒ <i>GACAC CCGGCGGGU UUCUG</i>)</p> <p><u><i>GAATTC TTCTGACAC CCGGCGGGT TTCTGACAC</i></u><br/> <b><i>CCGGCGGGT TTCTGACAC CCGGCGGGT TTCTGACAC</i></b><br/> <b><i>CCGGCGGGT TTCTGACAC CCGGCGGGT</i></b><br/> <b><i>TACTACAACCCAGAAACAGACAT <u>CCATGG</u></i></b></p> |
| m14    | <p>Increase the length of complementarity in the Gtx IRES-module at the 5' end by 2 nt (<i>GACAU CCGGCGGGU UUCUG</i> ⇒ <i>GACGC CCGGCGGGU UUCUG</i>)</p> <p><u><i>GAATTC TTCTGACGC CCGGCGGGT TTCTGACGC</i></u><br/> <b><i>CCGGCGGGT TTCTGACGC CCGGCGGGT TTCTGACGC</i></b><br/> <b><i>CCGGCGGGT TTCTGACGC CCGGCGGGT</i></b><br/> <b><i>TACTACAACCCAGAAACAGACAT <u>CCATGG</u></i></b></p> |
| m15    | <p>Increase the length of complementarity in the Gtx IRES-module at the 5' end by 4 nt (<i>GACAT CCGGCGGGT TTCTG</i> ⇒ <i>GCTGC CCGGCGGGT TTCTG</i>)</p> <p><u><i>GAATTC TTCTGCTGC CCGGCGGGT TTCTGCTGC</i></u><br/> <b><i>CCGGCGGGT TTCTGCTGC CCGGCGGGT TTCTGCTGC</i></b><br/> <b><i>CCGGCGGGT TTCTGCTGC CCGGCGGGT</i></b><br/> <b><i>TACTACAACCCAGAAACAGACAT <u>CCATGG</u></i></b></p> |
| m16    | <p>Decrease the length of complementarity in the Gtx IRES-module at the 5' end by 1 nt; however, the mutated sequence is contained</p>                                                                                                                                                                                                                                                  |

| Insert | Description                                                                                                                                                                                                                                                                                                                                                                                                                                                        |
|--------|--------------------------------------------------------------------------------------------------------------------------------------------------------------------------------------------------------------------------------------------------------------------------------------------------------------------------------------------------------------------------------------------------------------------------------------------------------------------|
|        | <p>within the context of the full-length Gtx 5' leader (1).<br/>           (CCCGAG CCGGC<del>GGG</del>U G ⇒ CCCGAG CCGGC<del>GGG</del>GA G)</p> <p><b><i>BsePI</i></b><br/> <u>GCGCGC</u> AA<del>ACTT</del>CCCGAG CCGGC<del>GGG</del>GA<br/>           GCGGGC<del>GGT</del>GGCAGC <u>GGGCCC</u></p> <p><b><i>ApaI</i></b></p>                                                                                                                                      |
| m17    | <p>Decrease the length of complementarity in the Gtx IRES-module at the 3' end by 2 nt; however, the mutated sequence is contained within the context of the full-length Gtx 5' leader (1).<br/>           (CCCGAG CCGGC<del>GGG</del>U G ⇒ CCGAG CCGGC<del>GGG</del>GAA G)</p> <p><b><i>BsePI</i></b><br/> <u>GCGCGC</u> AA<del>ACTT</del>CCCGAG CCGGC<del>GGG</del>GAA<br/>           GCGGGC<del>GGT</del>GGCAGC <u>GGGCCC</u></p> <p><b><i>ApaI</i></b></p>     |
| m18    | <p>Decrease the length of complementarity in the Gtx IRES-module at the 3' end by 4 nt; however, the mutated sequence is contained within the context of the full-length Gtx 5' leader (1).<br/>           (CCCGAG CCGGC<del>GGG</del>U G ⇒ CCGAG CCGGC<del>GGG</del>CAAAA G)</p> <p><b><i>BsePI</i></b><br/> <u>GCGCGC</u> AA<del>ACTT</del>CCCGAG CCGGC<del>GGG</del>CAAAA<br/>           GCGGGC<del>GGT</del>GGCAGC <u>GGGCCC</u></p> <p><b><i>ApaI</i></b></p> |
